# Supplementary material for: The Effect of the Creatine Analogue Beta-guanidinopropionic Acid on Energy Metabolism: A Systematic Review
Source: PubMed Central journal article supplement (PMC3541392; doi:10.1371/journal.pone.0052879), 2013-01-09

# A

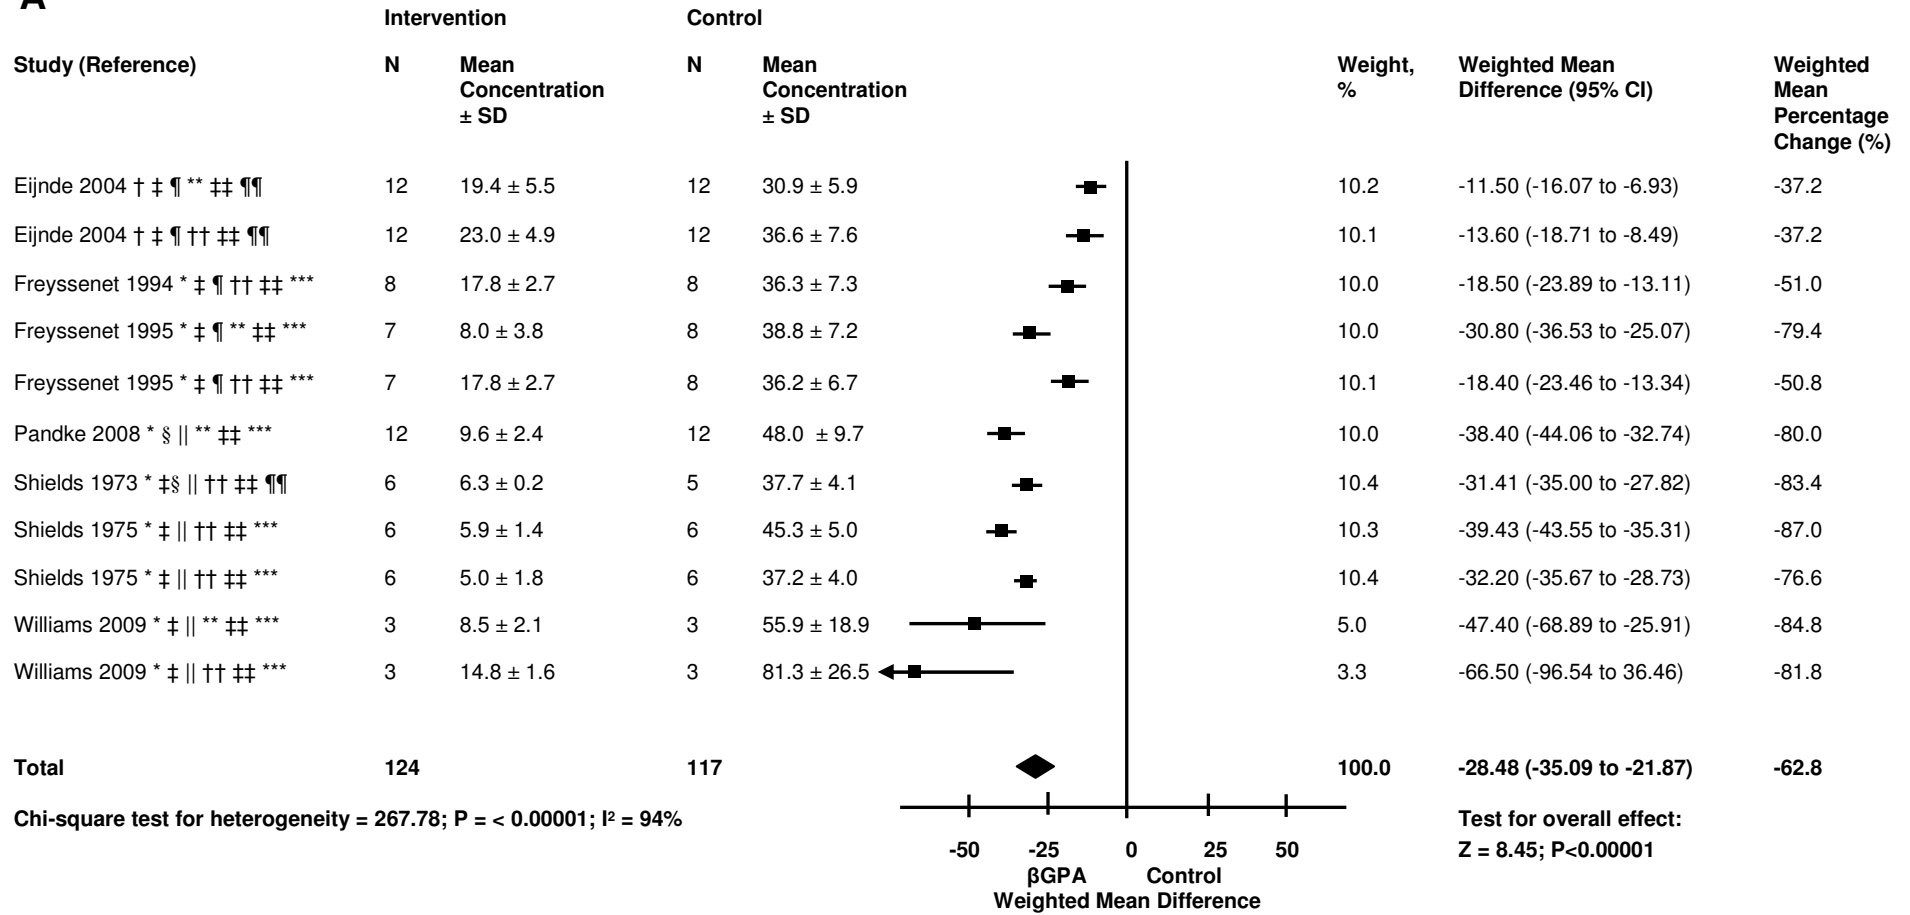

Chi-square test for heterogeneity = 267.78; P = < 0.00001; I<sup>2</sup> = 94%

**B**

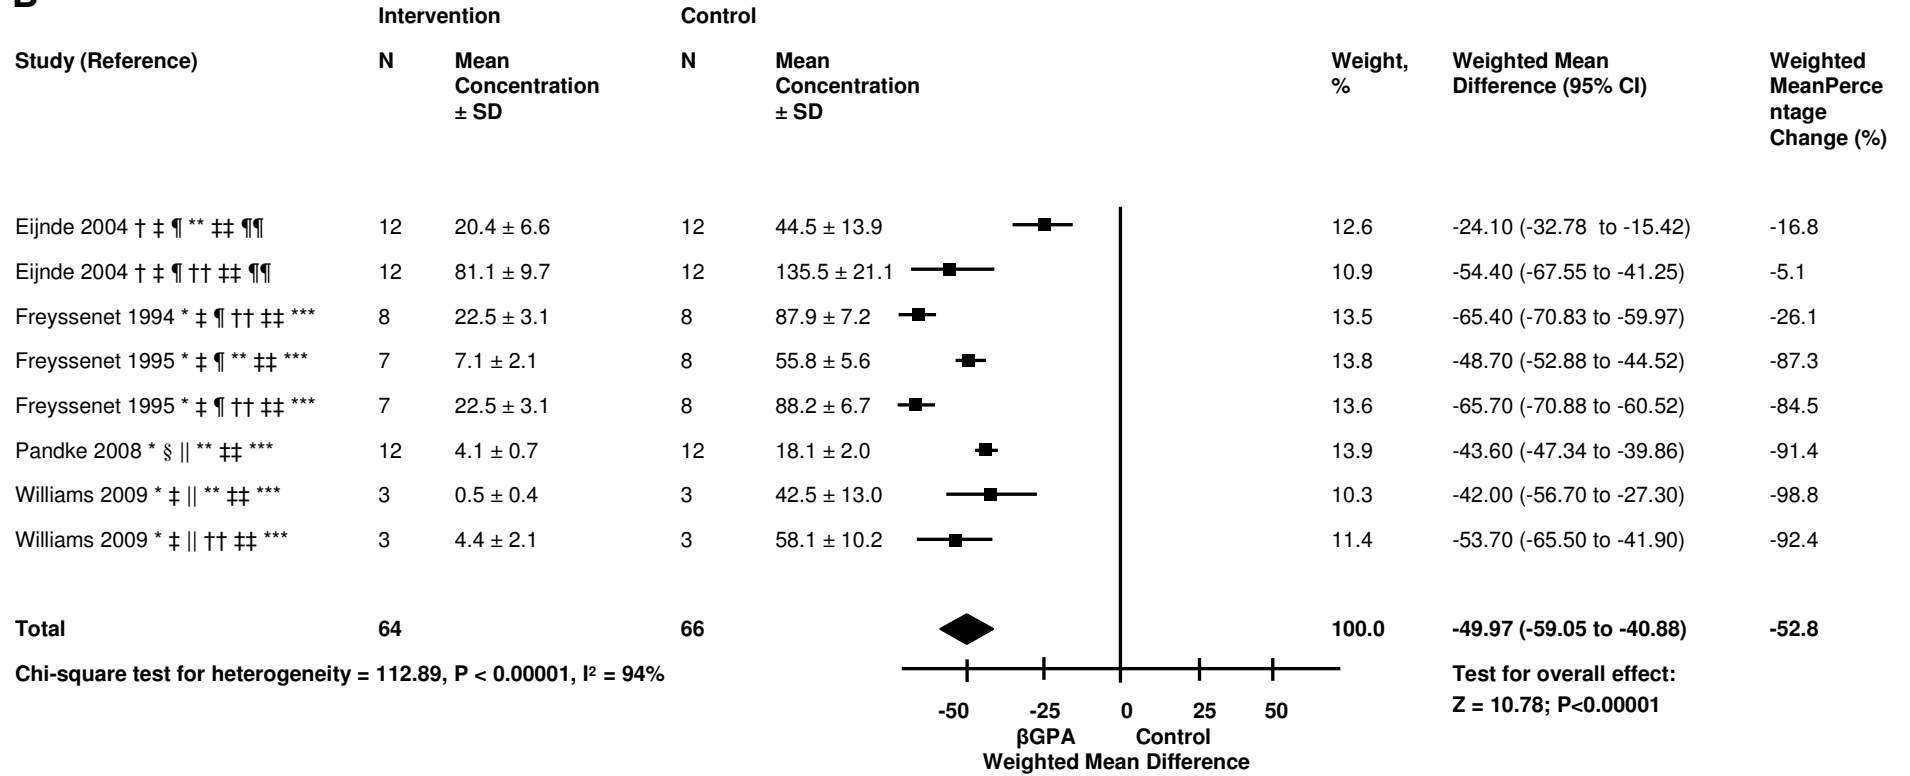

**C**

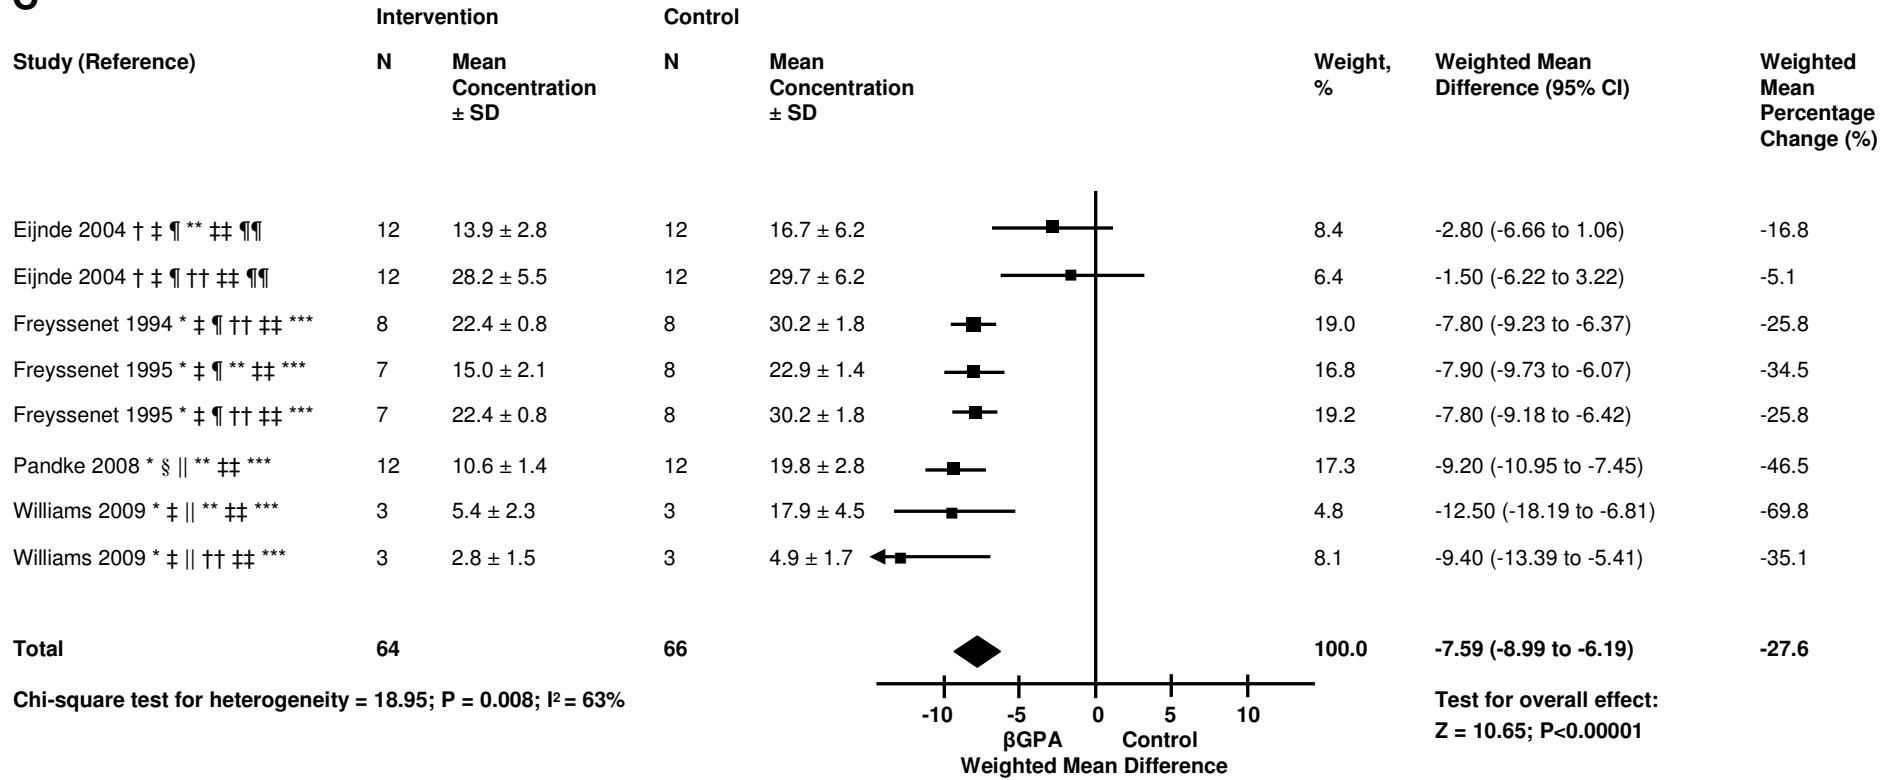

Chi-square test for heterogeneity = 18.95; P = 0.008; I<sup>2</sup> = 63%

# D

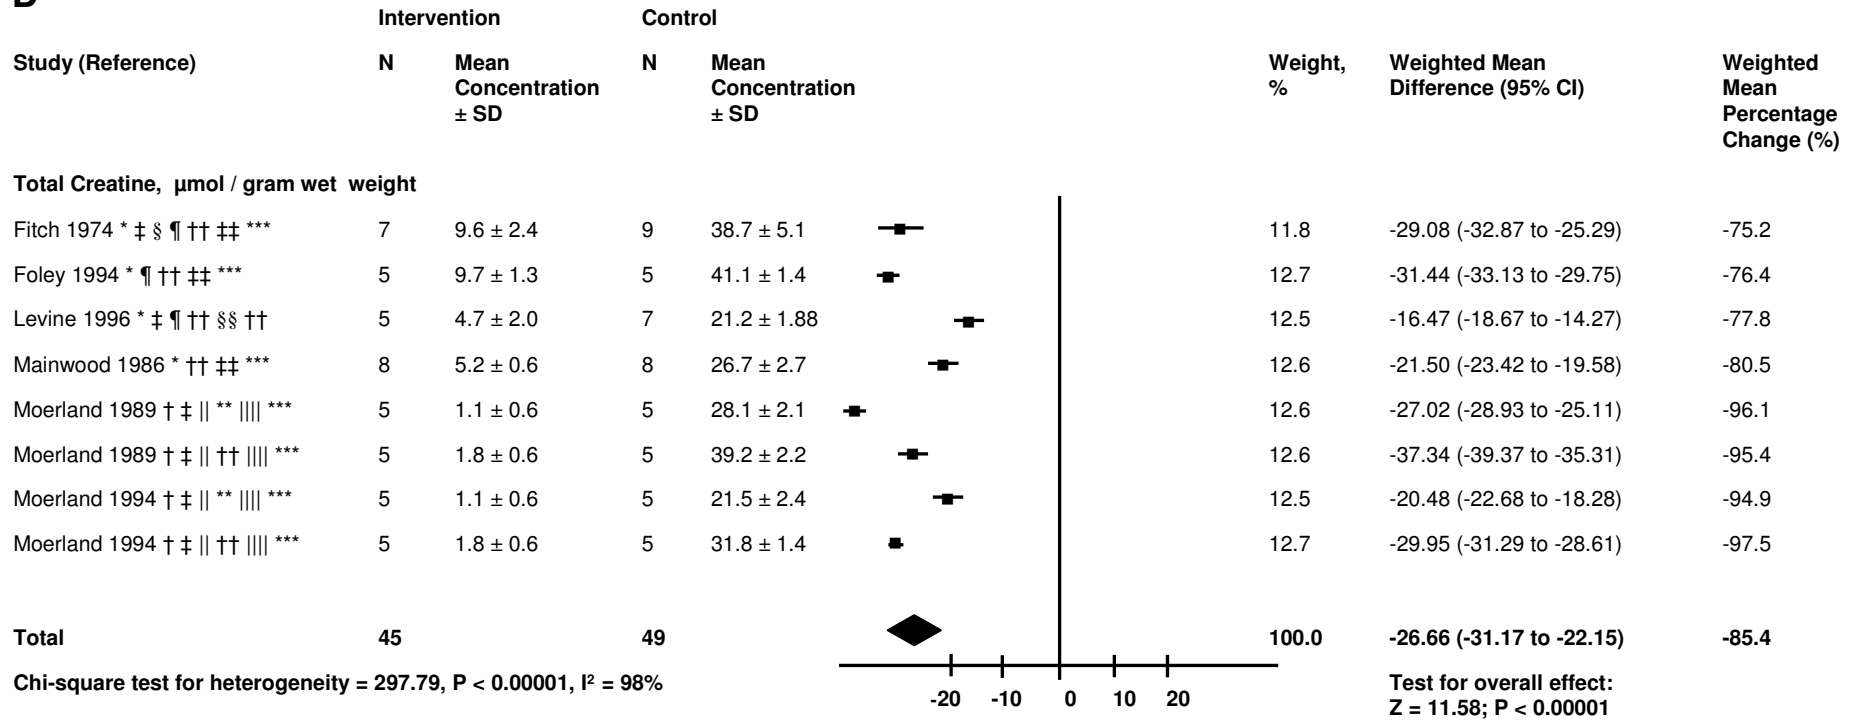

## Mitochondrial creatine kinase (densitometric analysis of immuno-stained Western blots)

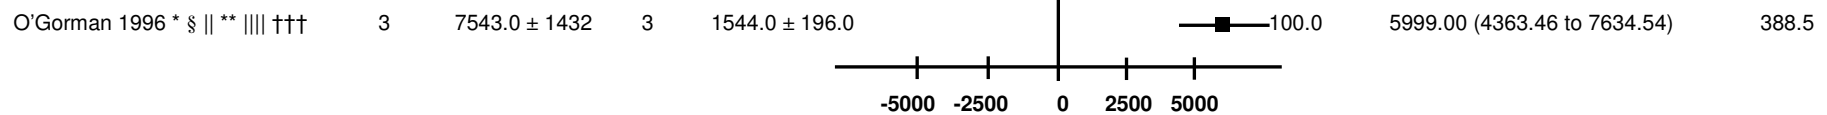

## Mitochondrial creatine kinase activity (nmol/min per mg protein)

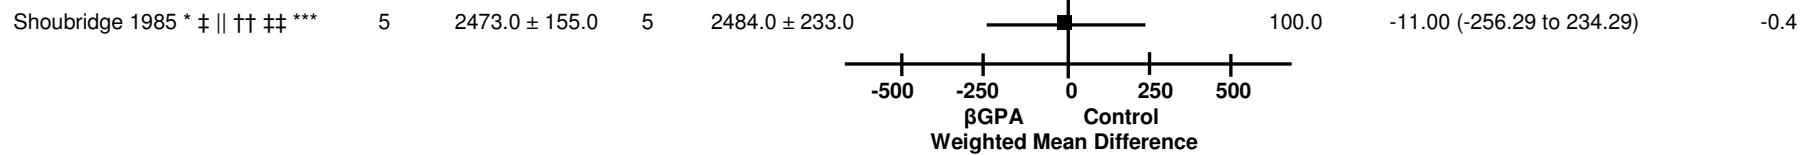

**E**

| Study (Reference)                   | Intervention |                         | Control   |                         | Weight, % | Weighted Mean Difference (95% CI) | Weighted Mean Percentage Change (%) |
|-------------------------------------|--------------|-------------------------|-----------|-------------------------|-----------|-----------------------------------|-------------------------------------|
|                                     | N            | Mean Concentration ± SD | N         | Mean Concentration ± SD |           |                                   |                                     |
| <b>µmol / min x gram wet weight</b> |              |                         |           |                         |           |                                   |                                     |
| De Tata 1993 * ‡ ** ‡‡ †††          | 6            | 1.12 ± 0.10             | 4         | 0.87 ± 0.02             | 26.3      | 0.25 (0.17 to 0.33)               | 28.7                                |
| De Tata 1993 * ‡ †† ‡‡ †††          | 5            | 1.79 ± 0.43             | 4         | 1.07 ± 0.12             | 8.1       | 0.72 (0.33 to 1.11)               | 67.3                                |
| Freyssenet 1995 * ‡ ¶ ** ‡‡ ***     | 7            | 1.95 ± 0.44             | 8         | 1.61 ± 0.26             | 8.8       | 0.34 (-0.03 to 0.71)              | 21.1                                |
| Freyssenet 1995 * ‡ ¶ †† ‡‡ ***     | 7            | 1.69 ± 0.20             | 8         | 1.23 ± 0.18             | 18.0      | 0.46 (0.27 to 0.65)               | 37.4                                |
| O'Gorman 1996 * §    **      †††    | 5            | 0.63 ± 0.40             | 5         | 1.00 ± 0.80             | 2.6       | -0.37 (-1.15 to 0.41)             | -21.2                               |
| Shoubridge 1985 * ‡    ** ‡‡ ***    | 5            | 1.38 ± 0.22             | 5         | 1.34 ± 0.17             | 14.7      | 0.04 (-0.20 to 0.28)              | 3.0                                 |
| Shoubridge 1985 * ‡    †† ‡‡ ***    | 5            | 1.35 ± 0.15             | 5         | 1.05 ± 0.08             | 21.4      | 0.30 (0.15 to 0.45)               | 28.6                                |
| <b>Total</b>                        | <b>40</b>    |                         | <b>39</b> |                         |           |                                   |                                     |

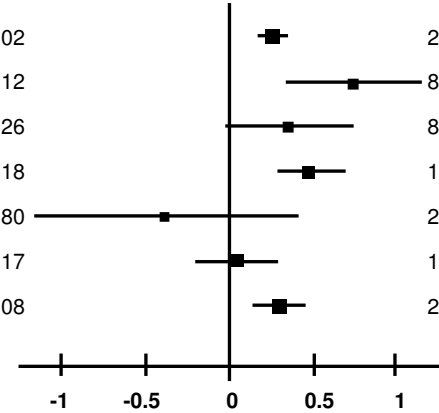

Chi-square test for heterogeneity = 15.13, P = 0.02, I<sup>2</sup> = 60%

**µmol / min x gram protein**

|                           |   |           |   |           |       |                     |      |
|---------------------------|---|-----------|---|-----------|-------|---------------------|------|
| Ren 1993 * ‡    †† ‡‡ *** | 8 | 8.1 ± 1.8 | 8 | 5.3 ± 0.9 | 100.0 | 2.72 (1.33 to 4.11) | 52.8 |
|---------------------------|---|-----------|---|-----------|-------|---------------------|------|

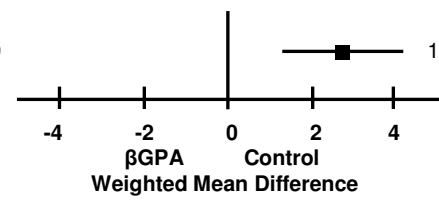

**F**

| Study (Reference)                   | Intervention |                         | Control    |                         | Weight, % | Weighted Mean Difference (95% CI) | Weighted Mean Percentage Change (%) |
|-------------------------------------|--------------|-------------------------|------------|-------------------------|-----------|-----------------------------------|-------------------------------------|
|                                     | N            | Mean Concentration ± SD | N          | Mean Concentration ± SD |           |                                   |                                     |
| <b>µmol / min x gram wet weight</b> |              |                         |            |                         |           |                                   |                                     |
| De Tata 1993 * ‡ †† ‡‡ †††          | 6            | 14.5 ± 5.2              | 6          | 13.8 ± 2.0              | 6.1       | 0.70 (-3.90 to 5.30)              | 5.1                                 |
| Ecochard 2004 * ‡    ** ‡‡ ¶¶       | 15           | 32.2 ± 13.2             | 15         | 31.0 ± 7.4              | 3.5       | 1.20 (-6.43 to 8.83)              | 3.9                                 |
| Ecochard 2004 * ‡    †† ‡‡ ¶¶       | 15           | 23.0 ± 4.7              | 15         | 19.9 ± 3.5              | 8.2       | 3.10 (0.16 to 6.04)               | 15.6                                |
| Freysenet 1994 * ‡ ¶ †† ‡‡ ***      | 8            | 12.2 ± 2.1              | 8          | 9.3 ± 1.6               | 9.6       | 2.90 (1.07 to 4.73)               | 31.2                                |
| Freysenet 1995 * ‡ ¶ ** ‡‡ ***      | 7            | 9.6 ± 1.3               | 8          | 9.8 ± 0.7               | 10.3      | -0.20 (-1.28 to 0.88)             | -2.0                                |
| Freysenet 1994 * ‡ ¶ †† ‡‡ ***      | 7            | 12.2 ± 0.1              | 8          | 9.0 ± 1.7               | 9.4       | 3.20 (1.25 to 5.15)               | 35.6                                |
| Lara 1998 * ‡    †† §§ ¶¶           | 10           | 40.7 ± 14.1             | 10         | 35.8 ± 11.7             | 1.8       | 4.90 (-6.82 to 16.62)             | 13.7                                |
| Moerland 1994 † ‡    **      ***    | 6            | 25.8 ± 3.4              | 6          | 25.9 ± 7.4              | 4.3       | -0.06 (-6.55 to 6.43)             | -0.2                                |
| Moerland 1994 † ‡    ††      ***    | 6            | 23.3 ± 4.4              | 6          | 14.8 ± 4.4              | 5.7       | 8.46 (3.49 to 13.43)              | 57.1                                |
| Pandke 2008 * §    ** ‡‡ ***        | 12           | 58.2 ± 5.2              | 12         | 48.2 ± 6.6              | 6.0       | 10.00 (5.25 to 14.75)             | 20.7                                |
| Shoubridge 1985 * ‡    ** ‡‡ ***    | 5            | 19.1 ± 1.7              | 5          | 19.6 ± 3.1              | 8.0       | -0.50 (-3.60 to 2.60)             | -1.0                                |
| Shoubridge 1985 * ‡    †† ‡‡ ***    | 5            | 21.2 ± 2.2              | 5          | 15.0 ± 1.7              | 8.8       | 6.20 (3.76 to 8.64)               | 41.3                                |
| Shoubridge 1985 * ‡    †† ‡‡ ***    | 5            | 28.1 ± 3.4              | 5          | 20.0 ± 2.9              | 6.9       | 8.10 (4.18 to 12.02)              | 40.5                                |
| Williams 2009 * ‡    ** ‡‡ ***      | 12           | 59.4 ± 9.4              | 12         | 56.4 ± 4.9              | 4.8       | 3.00 (-2.96 to 8.96)              | 25.1                                |
| Williams 2009 * ‡    †† ‡‡ ***      | 12           | 24.9 ± 4.2              | 12         | 19.9 ± 6.2              | 6.5       | 5.00 (0.76 to 9.24)               | 5.3                                 |
| <b>Total</b>                        | <b>130</b>   |                         | <b>131</b> |                         |           |                                   |                                     |

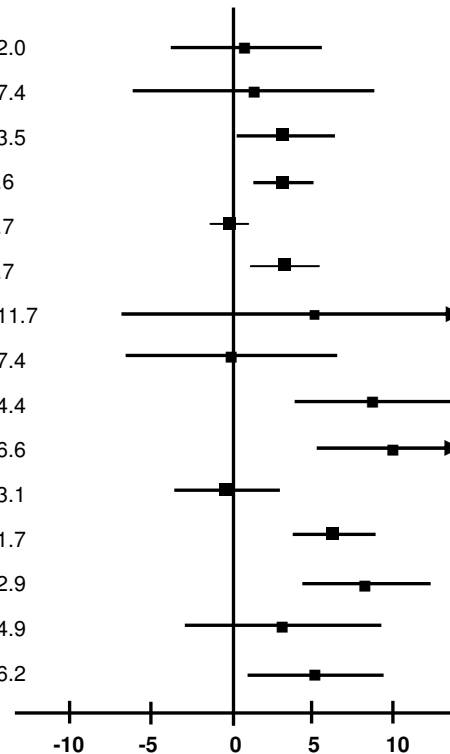

Chi-square test for heterogeneity = 62.29, P < 0.00001, I<sup>2</sup> = 78%

**µmol / min x gram protein**

|                           |   |              |   |              |       |                        |      |
|---------------------------|---|--------------|---|--------------|-------|------------------------|------|
| Ren 1993 * ‡    †† ‡‡ *** | 8 | 141.0 ± 22.6 | 8 | 101.0 ± 14.1 | 100.0 | 40.00 (21.51 to 58.49) | 39.6 |
|---------------------------|---|--------------|---|--------------|-------|------------------------|------|

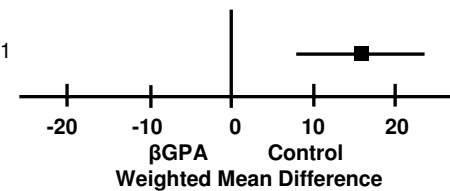

**G**

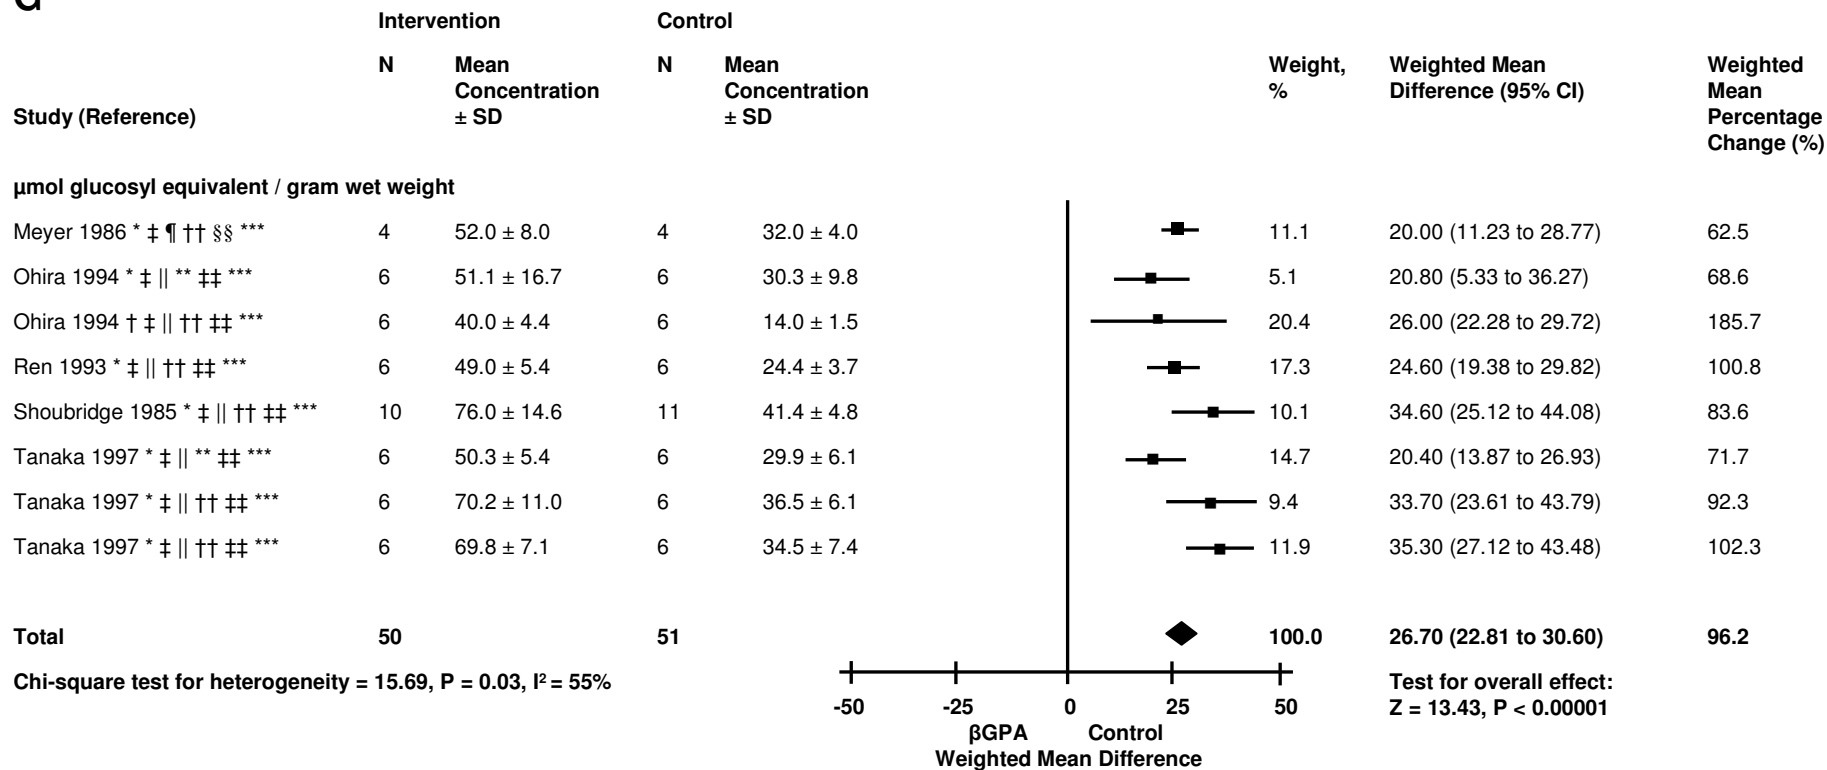

# H

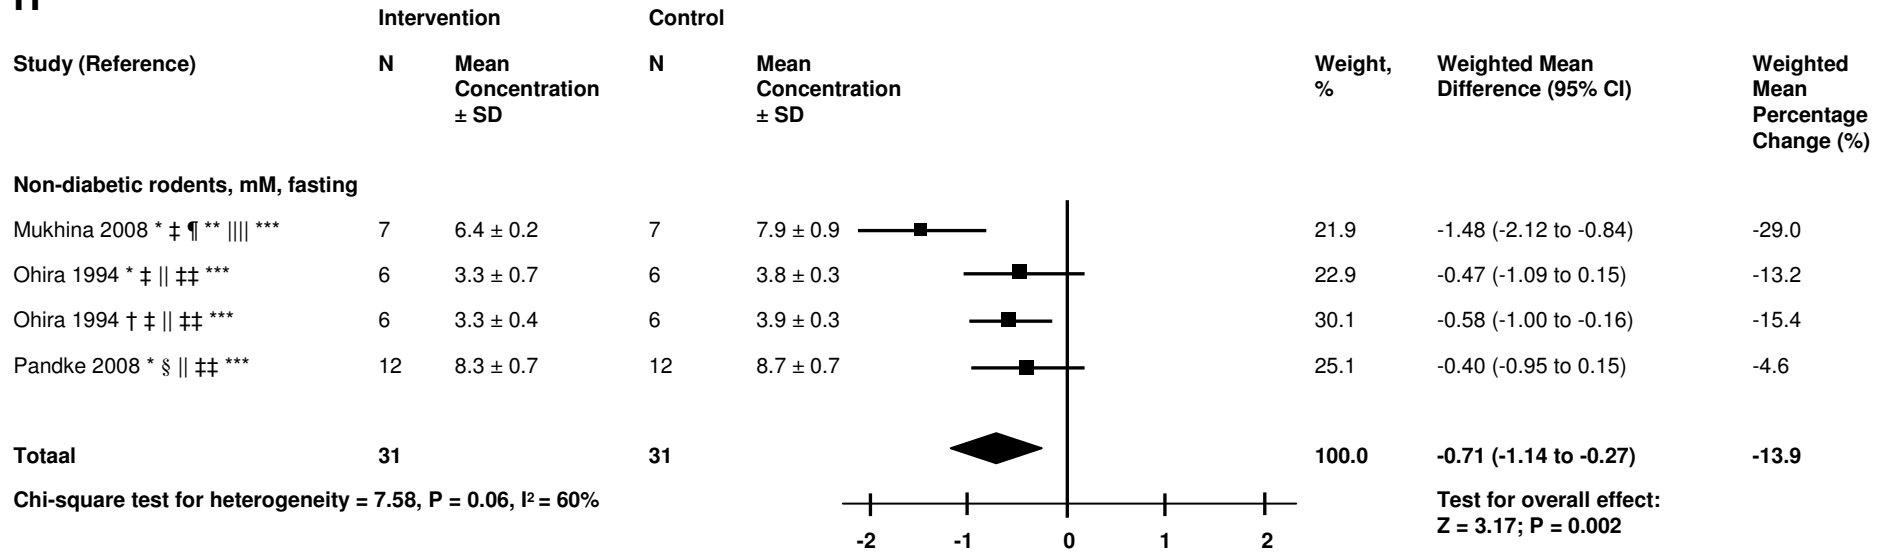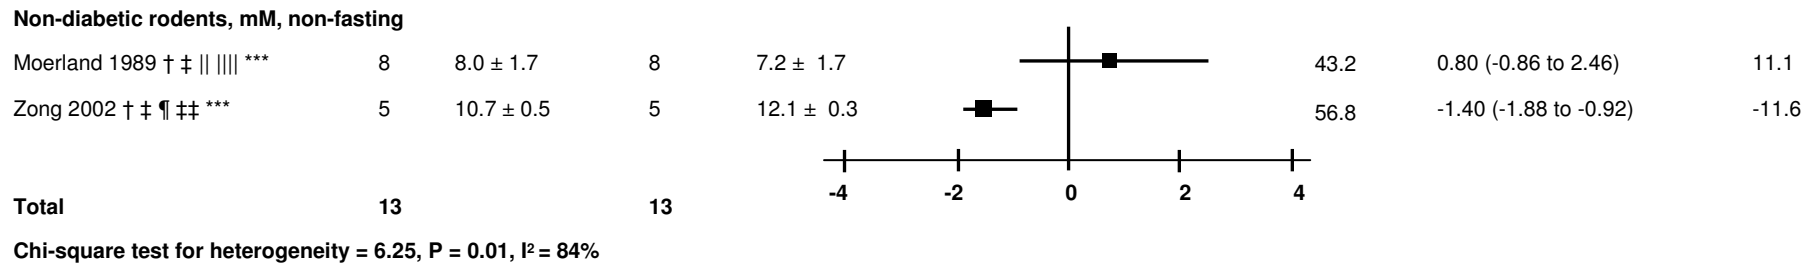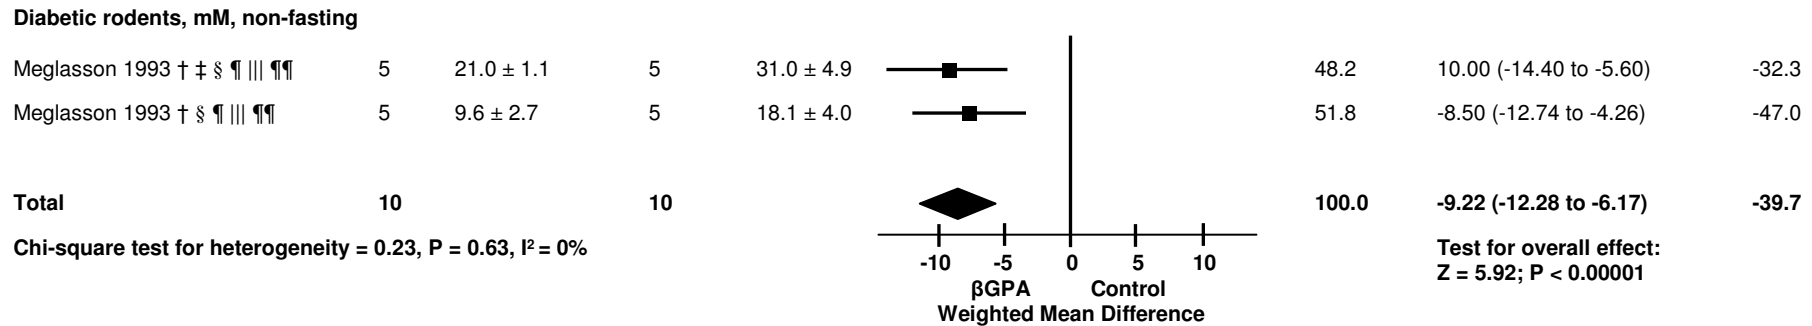



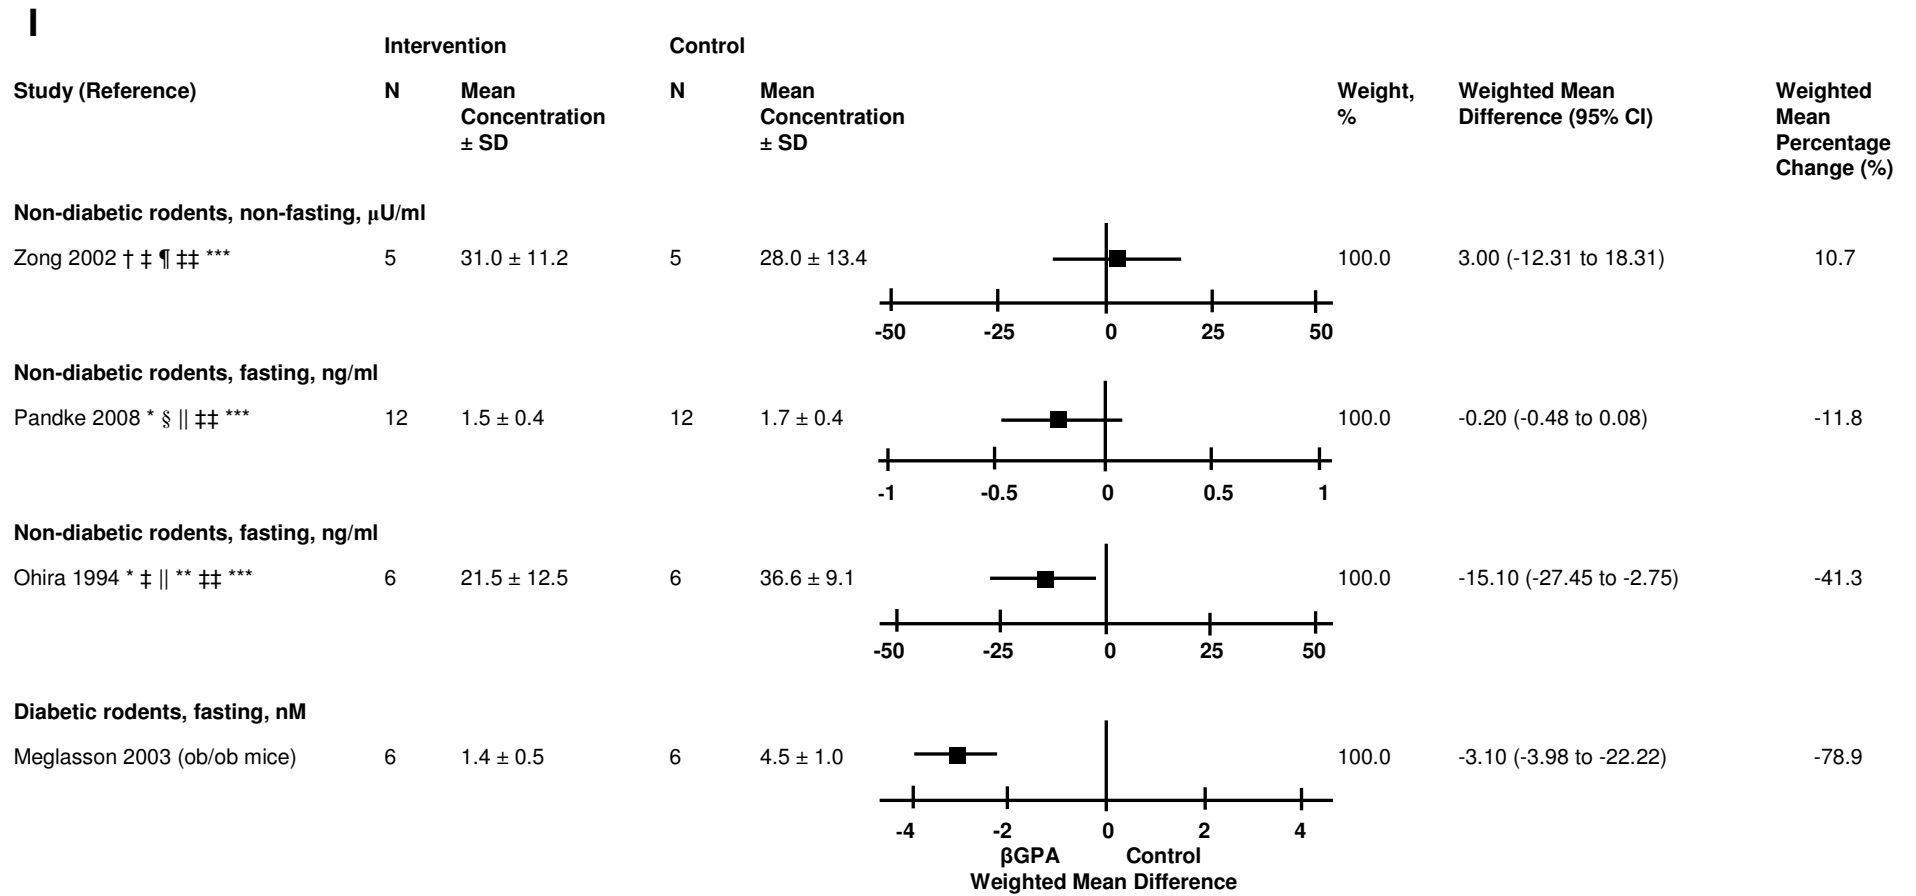

**J**

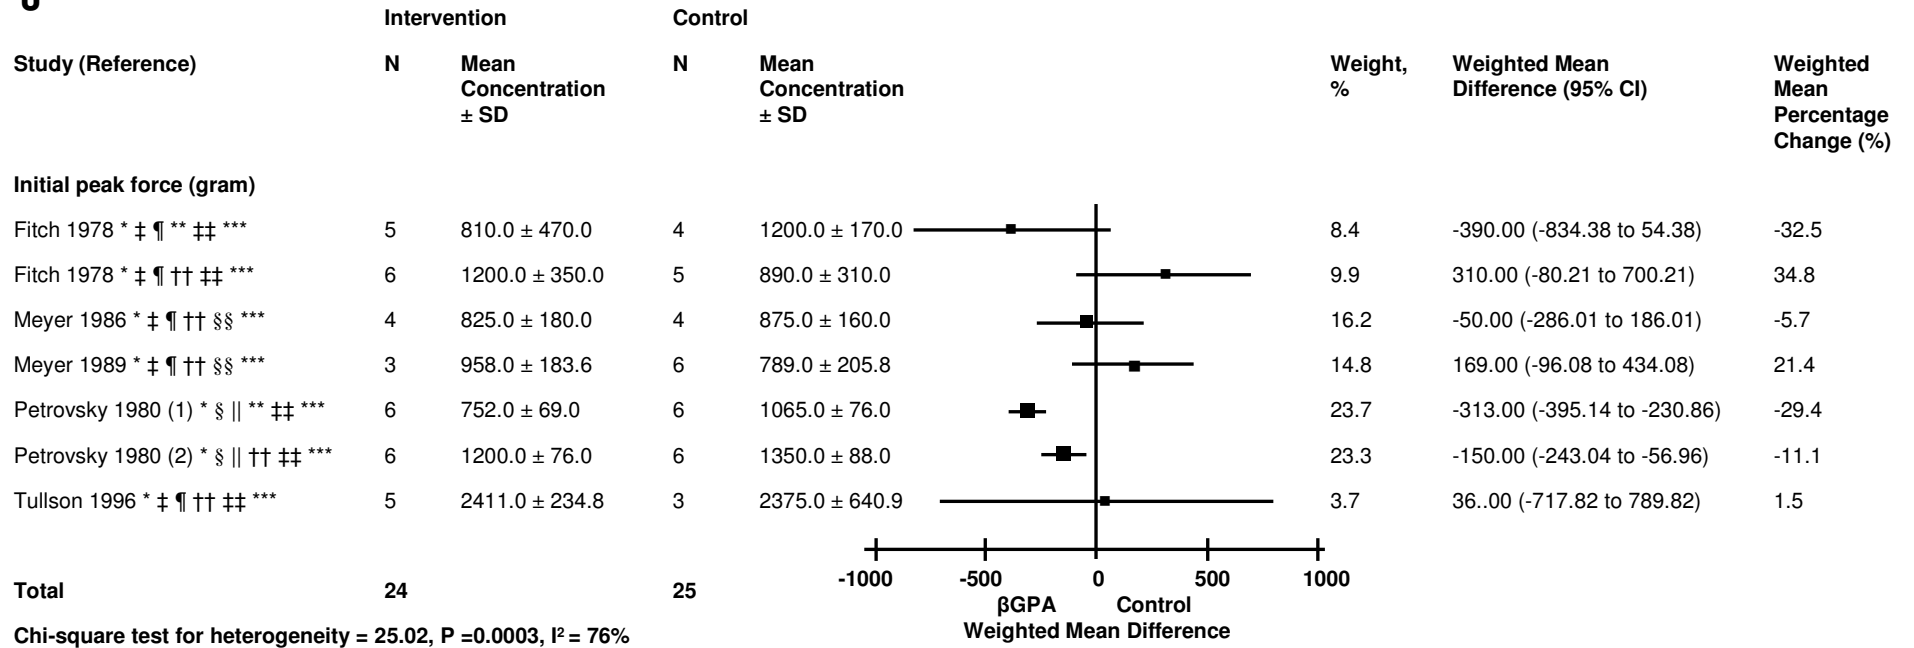

# K

| Study (Reference)                       | Intervention |                         | Control   |                         | Weight, % | Weighted Mean Difference (95% CI) | Weighted Mean Percentage Change (%) |
|-----------------------------------------|--------------|-------------------------|-----------|-------------------------|-----------|-----------------------------------|-------------------------------------|
|                                         | N            | Mean Concentration ± SD | N         | Mean Concentration ± SD |           |                                   |                                     |
| <b>Peak twitch force (gram)</b>         |              |                         |           |                         |           |                                   |                                     |
| Foley 1994 * ‡ ¶ †† ‡‡ ***              | 5            | 38.0 ± 4.5              | 5         | 38.0 ± 8.9              | 12.8      | 0.00 (-8.76 to 8.76)              | 0.0                                 |
| Mainwood 1982-2 * ‡ ¶ †† ‡‡ ***         | 6            | 21.9 ± 5.9              | 6         | 18.4 ± 3.7              | 16.1      | 3.50 (-2.05 to 9.05)              | 19.0                                |
| Nasledov 1996 * ‡ ¶ †† ***      *** ¶ ¶ | 6            | 14.0 ± 1.6              | 6         | 11.0 ± 2.0              | 19.0      | 3.00 (0.95 to 5.05)               | 27.3                                |
| Nasledov 1996 * ‡ ¶ †† ***      *** ¶ ¶ | 5            | 28.0 ± 5.0              | 5         | 25.0 ± 2.8              | 16.7      | 3.00 (-2.02 to 8.02)              | 12.0                                |
| Wakatsuki 1994 * ‡ ¶ †† ** ‡‡ ***       | 6            | 12.7 ± 2.7              | 6         | 17.8 ± 6.1              | 16.3      | -5.10 (-10.45 to 0.25)            | -28.7                               |
| Wakatsuki 1995 * ‡ ¶ †† ‡‡ ***          | 6            | 12.5 ± 1.2              | 6         | 20.2 ± 2.0              | 19.1      | -7.70 (-9.55 to -5.85)            | -38.1                               |
| <b>Total</b>                            | <b>34</b>    |                         | <b>34</b> |                         |           |                                   |                                     |

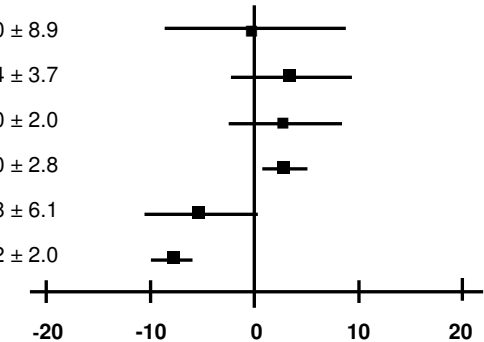

Chi-square test for heterogeneity = 68.16, P < 0.00001, I<sup>2</sup> = 93%

|                                             |           |            |           |           |      |                        |       |
|---------------------------------------------|-----------|------------|-----------|-----------|------|------------------------|-------|
| <b>Peak twitch force (N/cm<sup>2</sup>)</b> |           |            |           |           |      |                        |       |
| Eijnde 2004 † ‡ ¶ †† ** ‡‡ ¶ ¶              | 12        | 5.1 ± 1.4  | 10        | 4.3 ± 1.3 | 18.4 | 0.80 (-0.31 to 1.91)   | 18.6  |
| Eijnde 2004 † ‡ ¶ †† ‡‡ ¶ ¶                 | 12        | 7.9 ± 1.9  | 11        | 9.4 ± 3.1 | 13.3 | -1.48 (-3.63 to 0.67)  | -16.0 |
| Gagnon 2002 * ‡ ¶ †† ***      ¶ ¶           | 6         | 0.6 ± 0.5  | 6         | 1.0 ± 0.8 | 20.1 | -0.40 (-1.10 to 0.30)  | -40.0 |
| Gagnon 2002 * ‡ ¶ †† ‡‡      ¶ ¶            | 6         | 1.4 ± 0.9  | 5         | 0.9 ± 0.5 | 19.5 | 0.56 (-0.30 to 1.42)   | 55.6  |
| Levine 1996 * ‡ ¶ †† ‡‡ §§ ††               | 15        | 3.7 ± 1.22 | 15        | 6.4 ± 1.3 | 19.3 | -2.68 (-3.58 to -1.78) | -42.2 |
| Mainwood 1982-2 * ‡ ¶ †† ‡‡ ***             | 6         | 9.7 ± 2.9  | 6         | 7.4 ± 2.5 | 9.5  | 2.30 (-0.76 to 5.36)   | 31.1  |
| <b>Total</b>                                | <b>57</b> |            | <b>53</b> |           |      |                        |       |

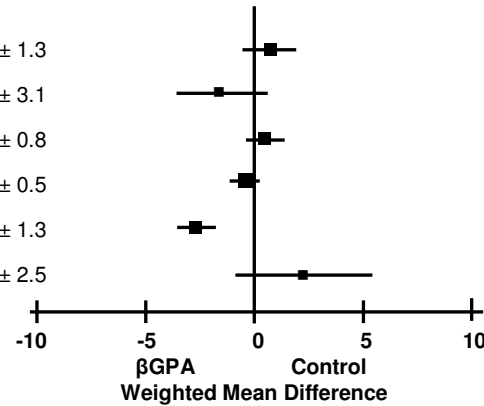

Chi-square test for heterogeneity = 37.85, P < 0.00001, I<sup>2</sup> = 87%

L

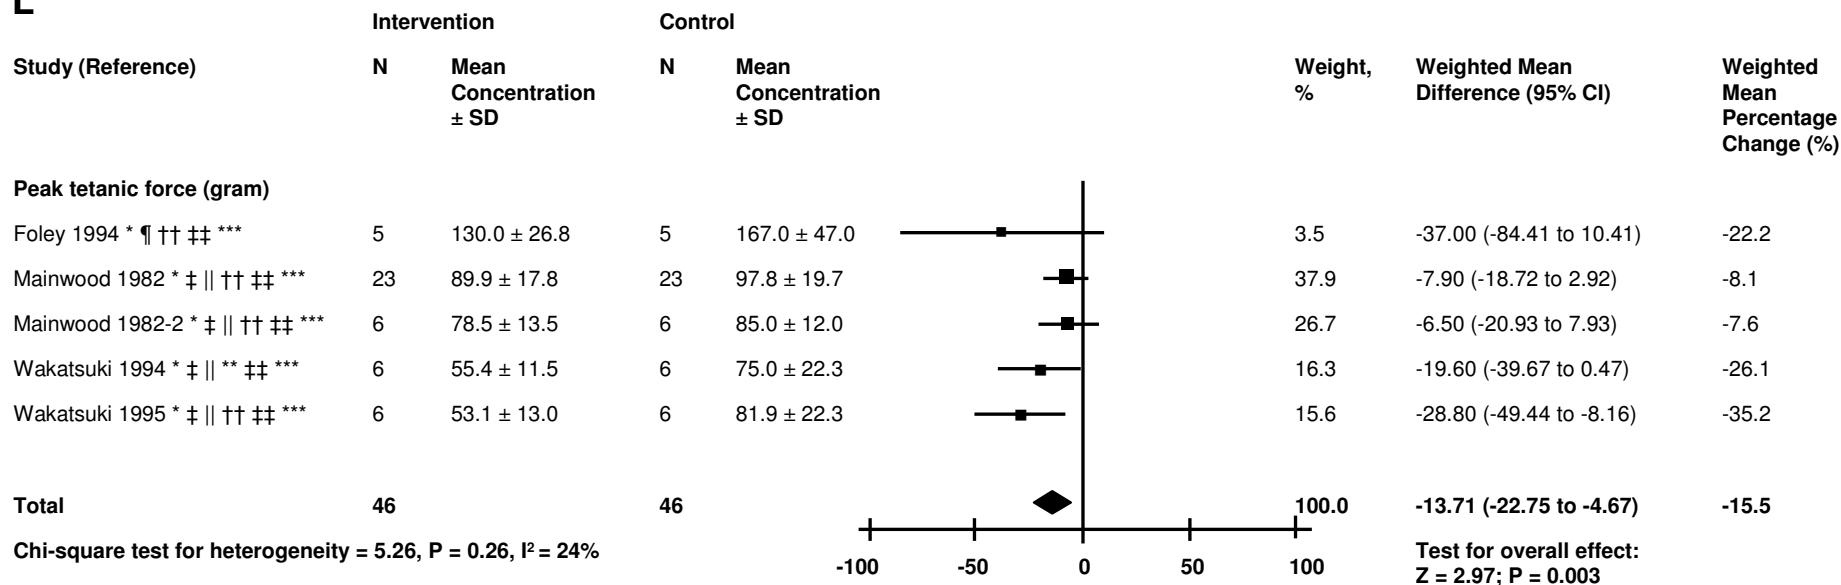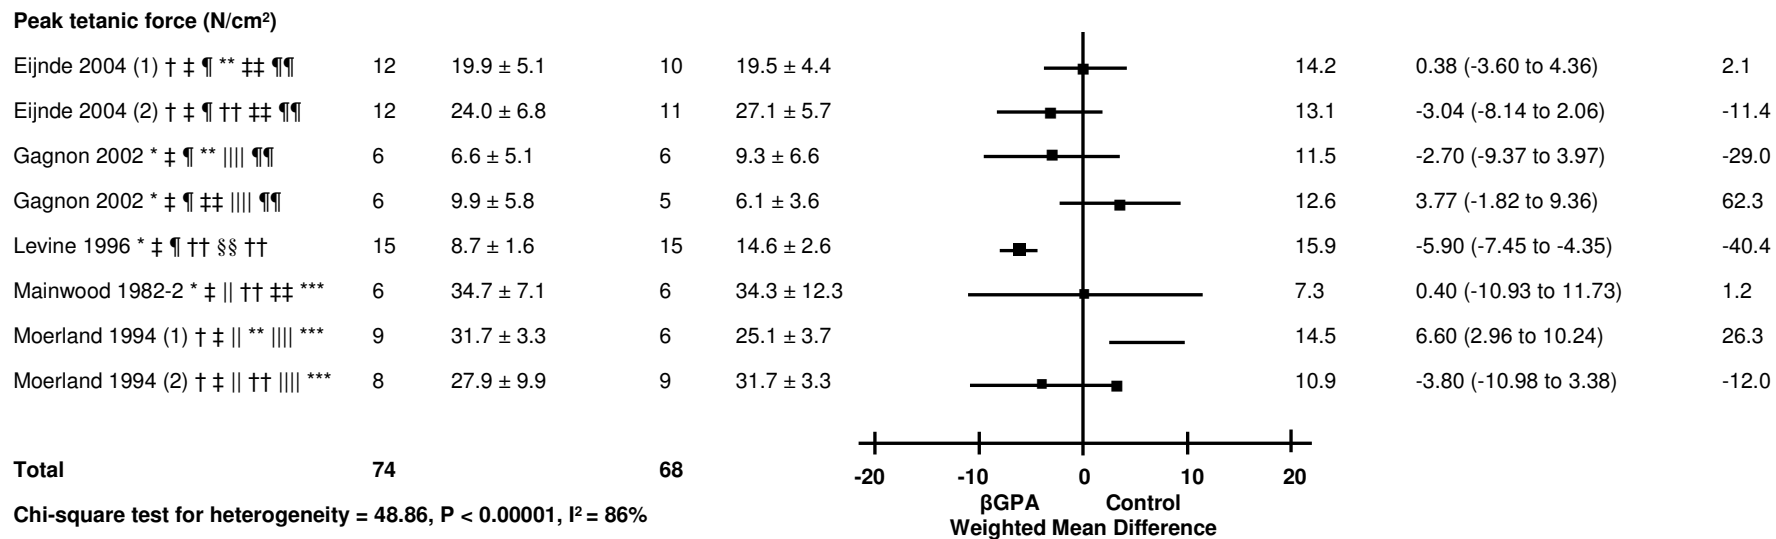

# M

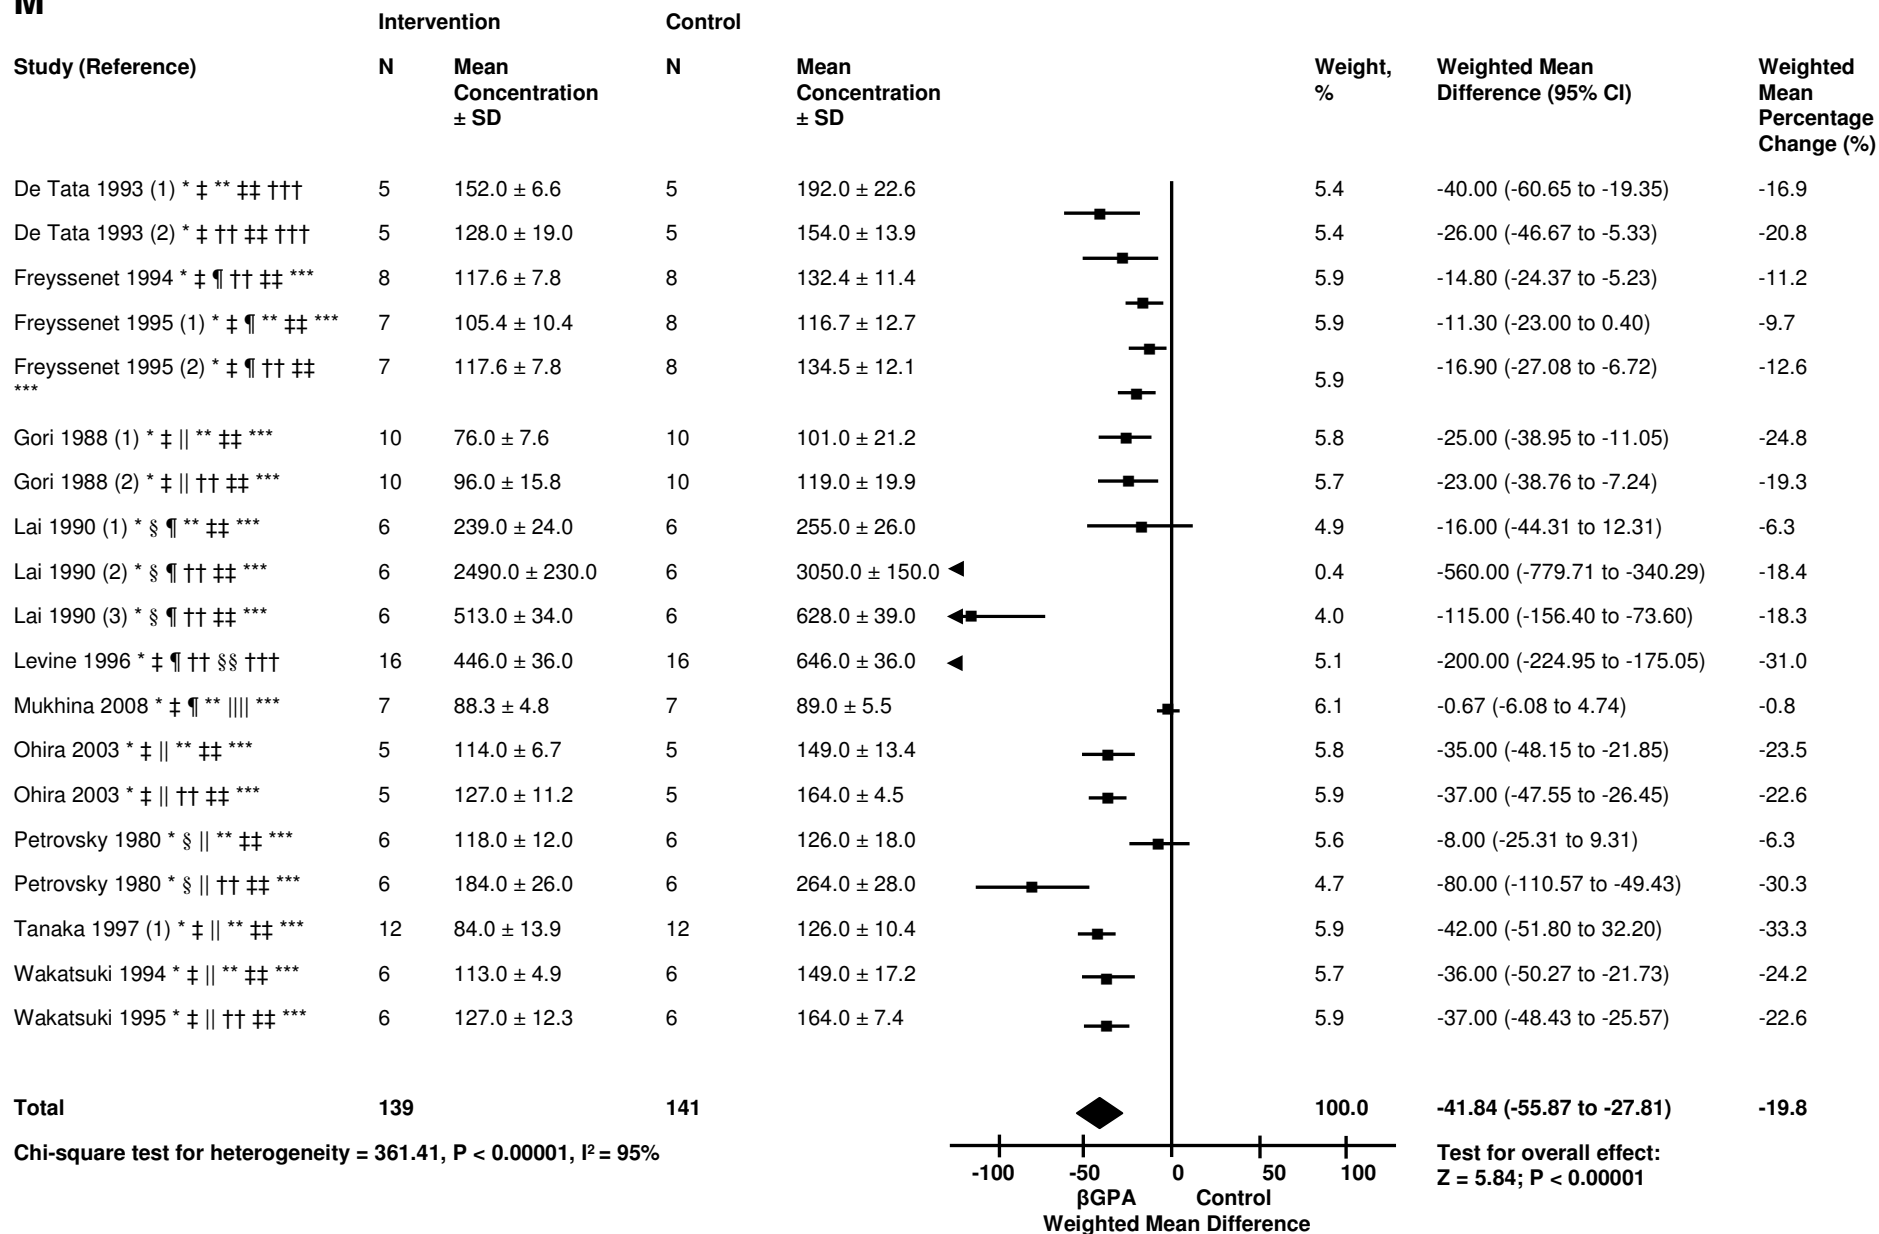

Supplement: pone.0052879.s001.pdf [file pone.0052879.s001.pdf]
