# Supplementary material for: The Effect of the Creatine Analogue Beta-guanidinopropionic Acid on Energy Metabolism: A Systematic Review
Source: PubMed Central journal article supplement (PMC3541392; doi:10.1371/journal.pone.0052879), 2013-01-09
Supplement: pone.0052879.s002.pdf [file pone.0052879.s002.pdf]

# A

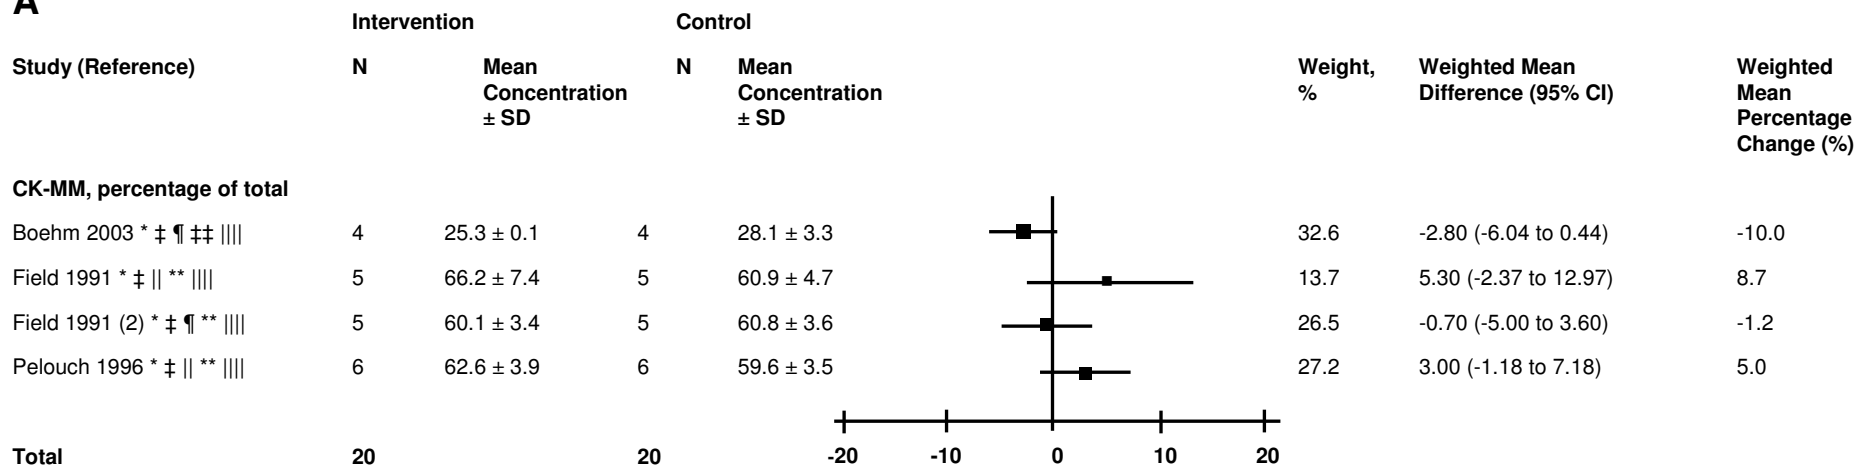

Chi-square test for heterogeneity = 6.76; P = 0.08; I<sup>2</sup> = 56%

## CK-MB, percentage of total

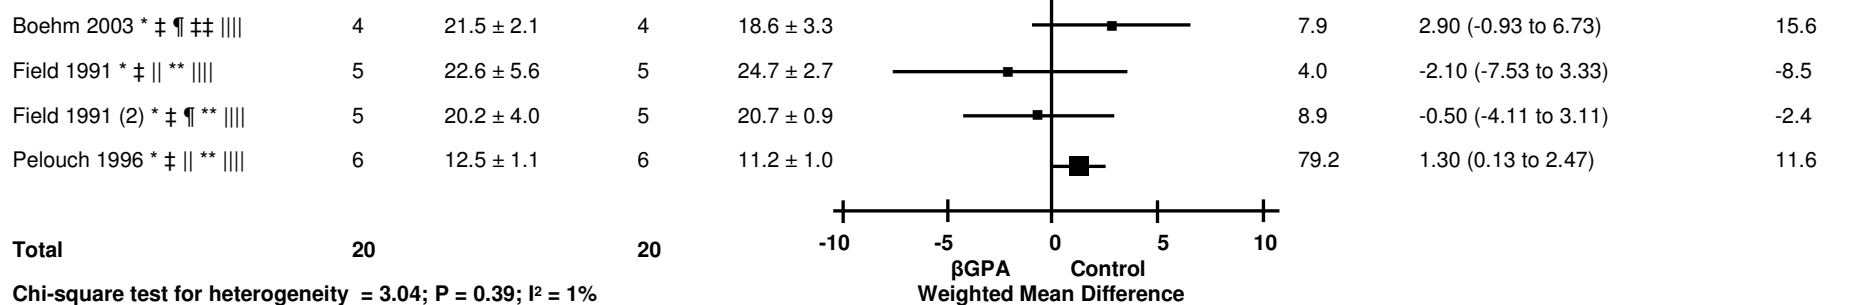

Chi-square test for heterogeneity = 3.04; P = 0.39; I<sup>2</sup> = 1%



**C**

| Study (Reference)                                                               | Intervention |                         | Control   |                         | Weight, %    | Weighted Mean Difference (95% CI) | Weighted Mean Percentage Change (%) |
|---------------------------------------------------------------------------------|--------------|-------------------------|-----------|-------------------------|--------------|-----------------------------------|-------------------------------------|
|                                                                                 | N            | Mean Concentration ± SD | N         | Mean Concentration ± SD |              |                                   |                                     |
| <b>Citrate synthase, <math>\mu\text{mol}/\text{min}</math> per g wet weight</b> |              |                         |           |                         |              |                                   |                                     |
| Field 1991 * ‡    **                                                            | 5            | 55.3 ± 10.6             | 5         | 60.6 ± 9.5              | 24.9         | -5.30 (-17.80 to 7.20)            | -8.7                                |
| Field 1991 (2) * ‡ ¶ **                                                         | 5            | 62.3 ± 7.5              | 5         | 62.3 ± 4.4              | 66.3         | 0.00 (-7.67 to 7.67)              | 0.0                                 |
| Shoubridge 1985 * ‡    **                                                       | 5            | 98.7 ± 20.3             | 5         | 111.0 ± 12.9            | 8.8          | -12.30 (-33.38 to 8.78)           | -11.1                               |
| <b>Total</b>                                                                    | <b>15</b>    |                         | <b>15</b> |                         | <b>100.0</b> | <b>-2.40 (-8.64 to 3.84)</b>      | <b>-6.6</b>                         |

Chi-square test for heterogeneity = 1.43; P = 0.49; I<sup>2</sup> = 0%

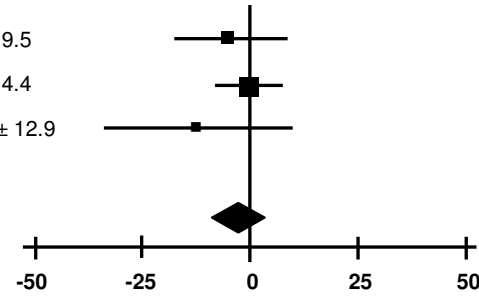

Test for overall effect:  
Z = 0.75; P = 0.45

**Hexokinase,  $\mu\text{mol}/\text{g}$  wet weight**

|                           |   |           |   |           |       |                       |      |
|---------------------------|---|-----------|---|-----------|-------|-----------------------|------|
| Shoubridge 1985 * ‡    ** | 4 | 5.8 ± 0.7 | 4 | 6.1 ± 0.1 | 100.0 | -0.27 (-0.96 to 0.42) | -4.9 |
|---------------------------|---|-----------|---|-----------|-------|-----------------------|------|

**Hexokinase, U/g wet weight**

|                            |   |           |   |           |       |                        |       |
|----------------------------|---|-----------|---|-----------|-------|------------------------|-------|
| O'Gorman 1997 * ‡    ‡‡ ¶¶ | 5 | 1.4 ± 0.4 | 5 | 3.0 ± 0.3 | 100.0 | -1.60 (-2.04 to -1.16) | -53.3 |
|----------------------------|---|-----------|---|-----------|-------|------------------------|-------|

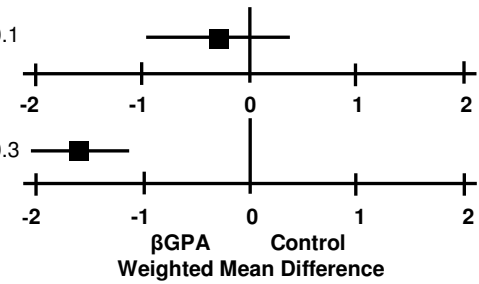

$\beta\text{GPA}$  Control  
Weighted Mean Difference

**D**

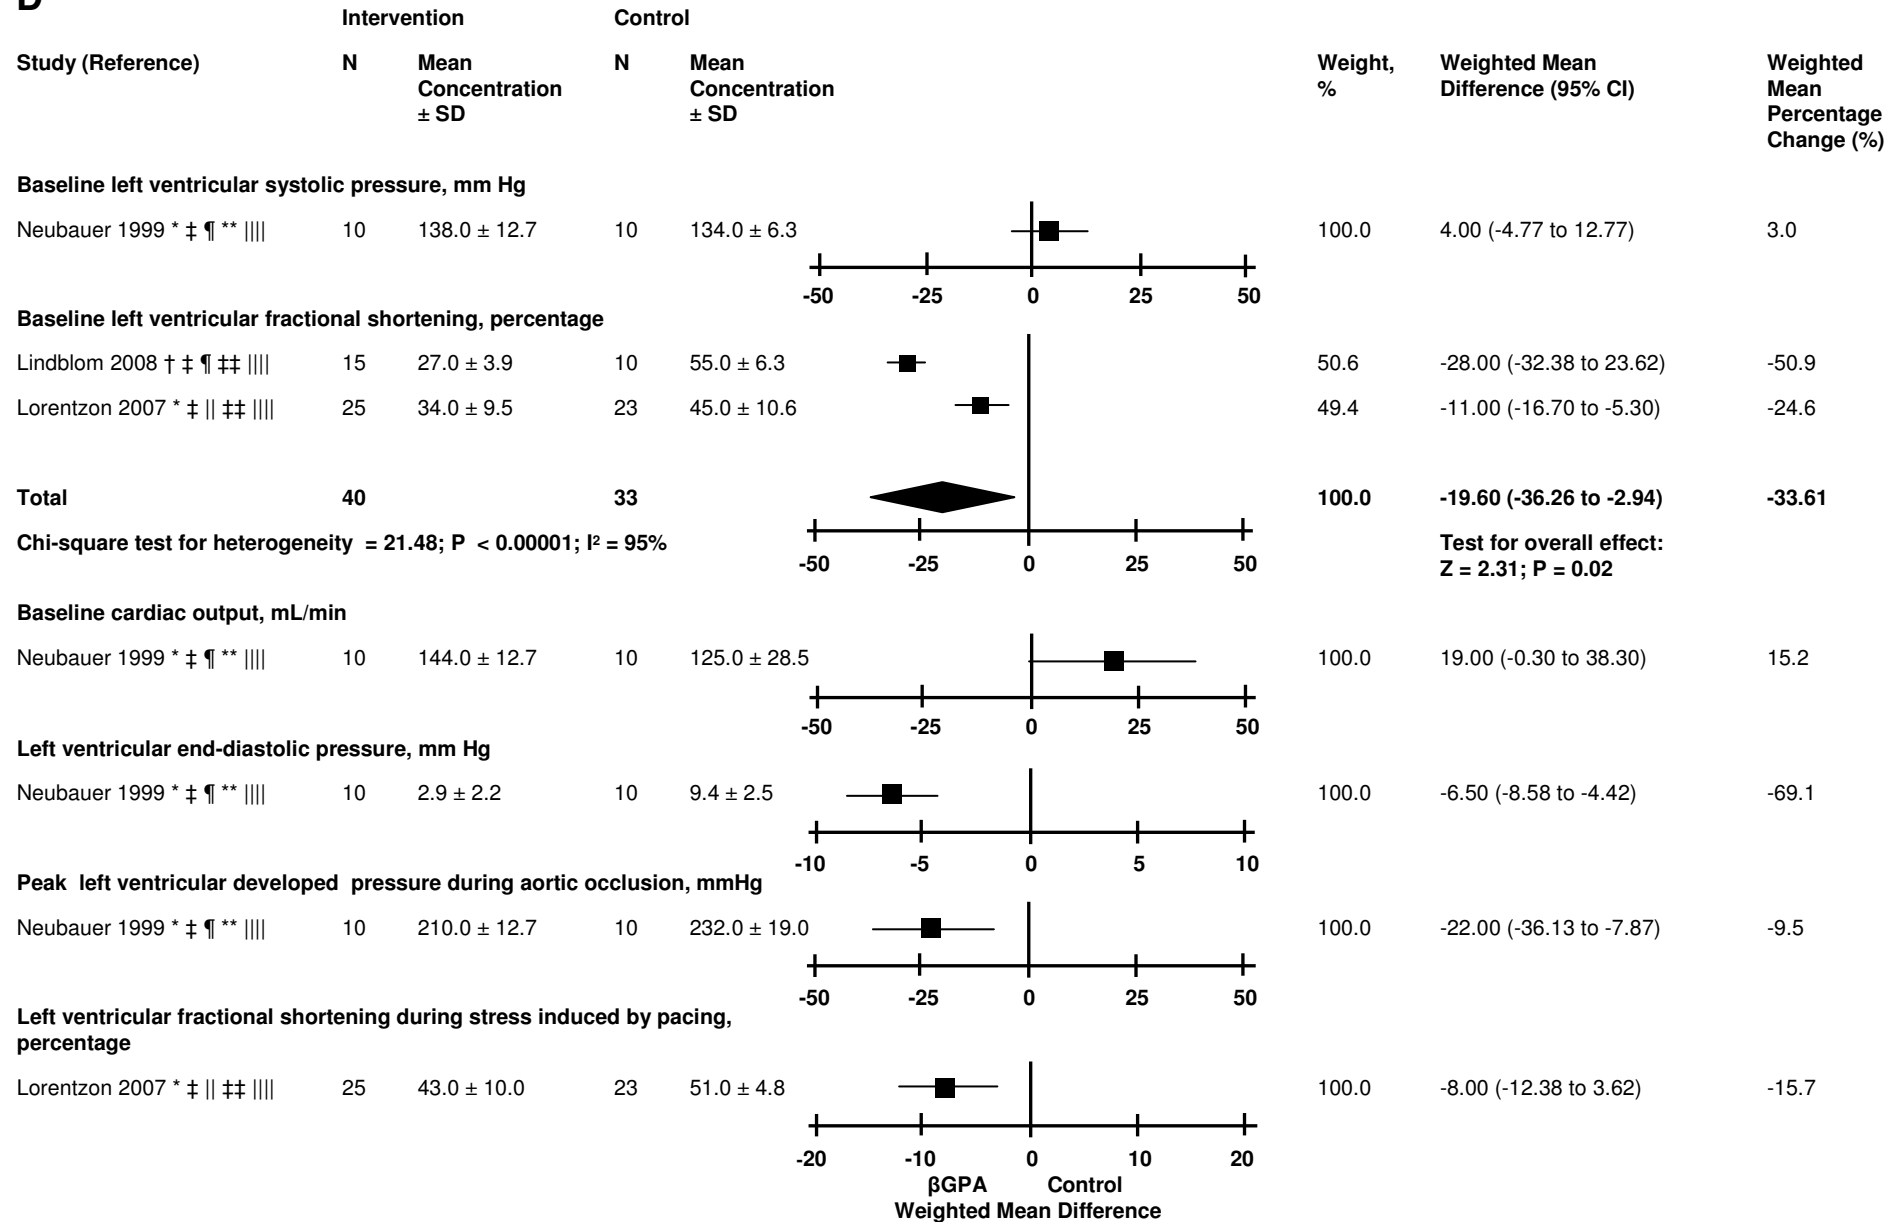

**E**

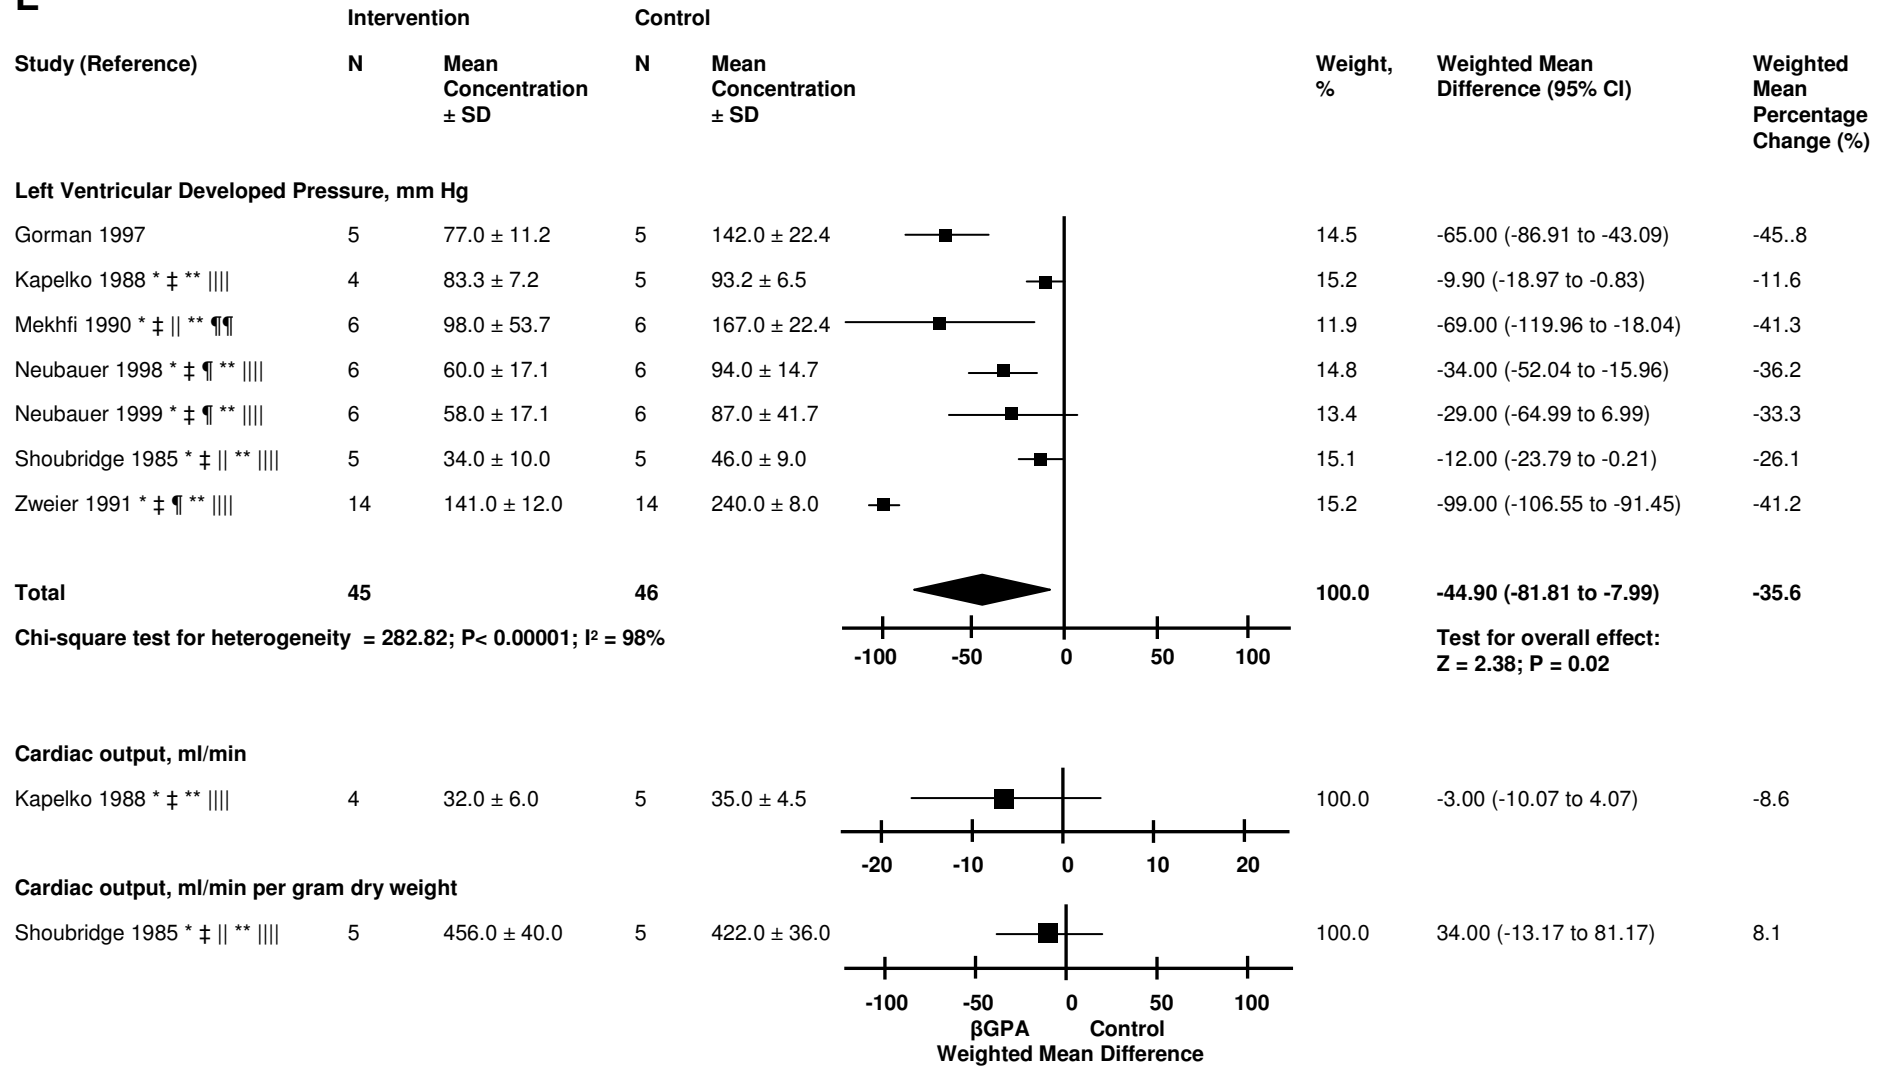

**F**

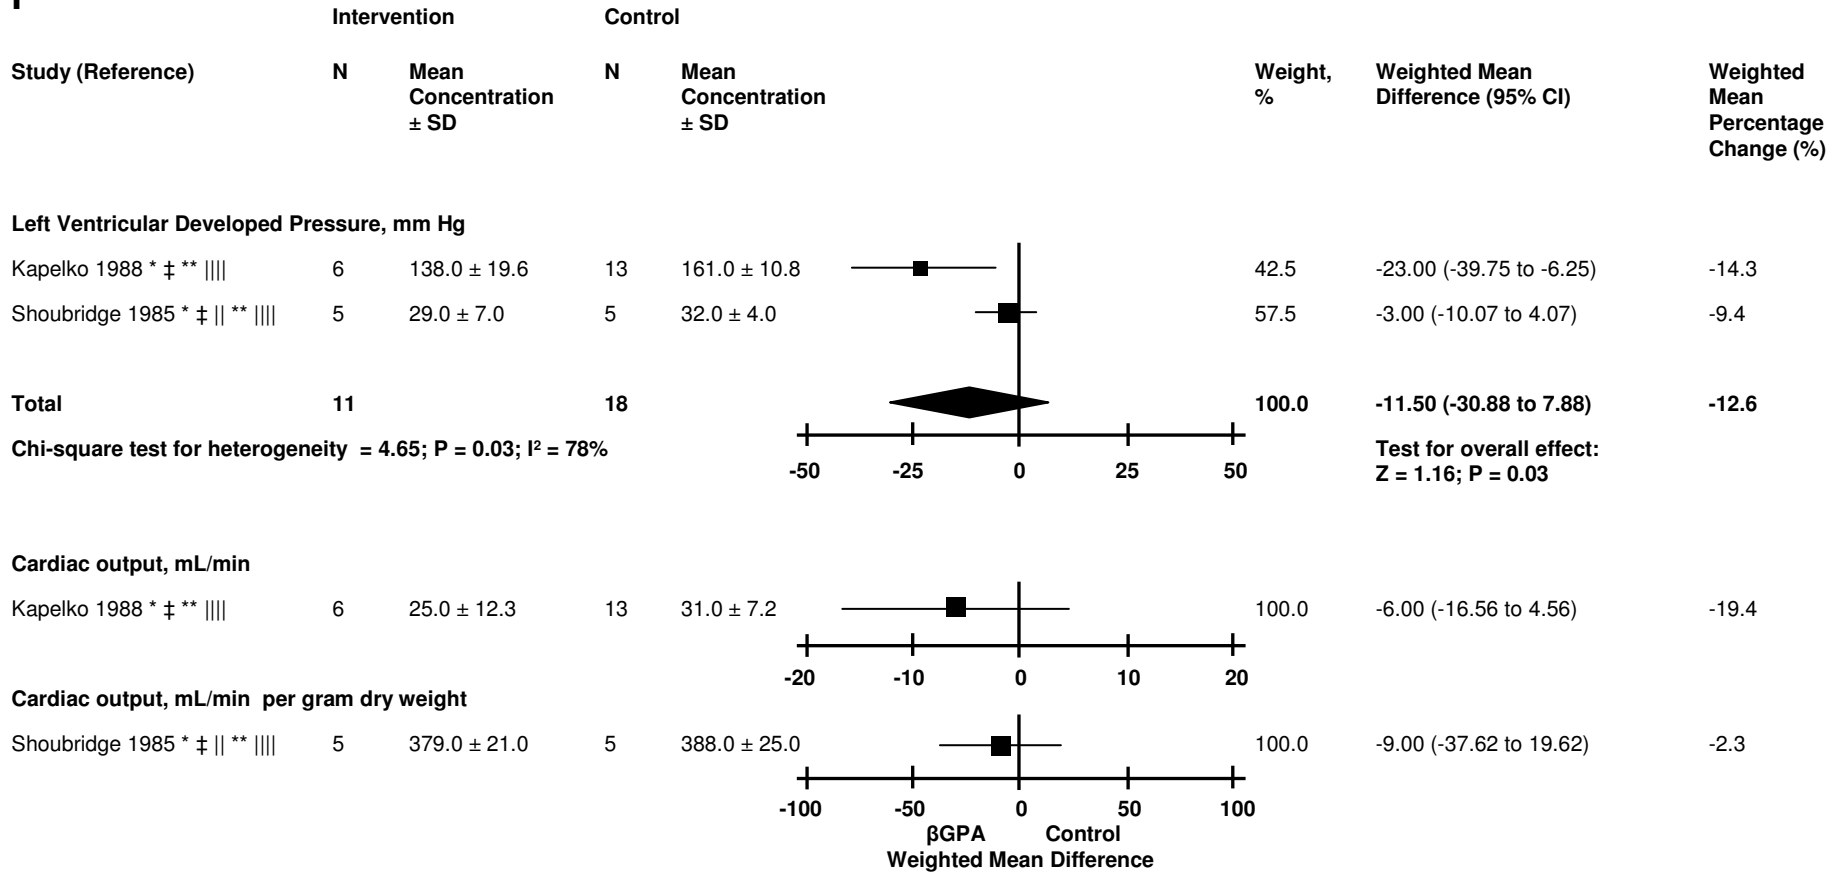

**G**

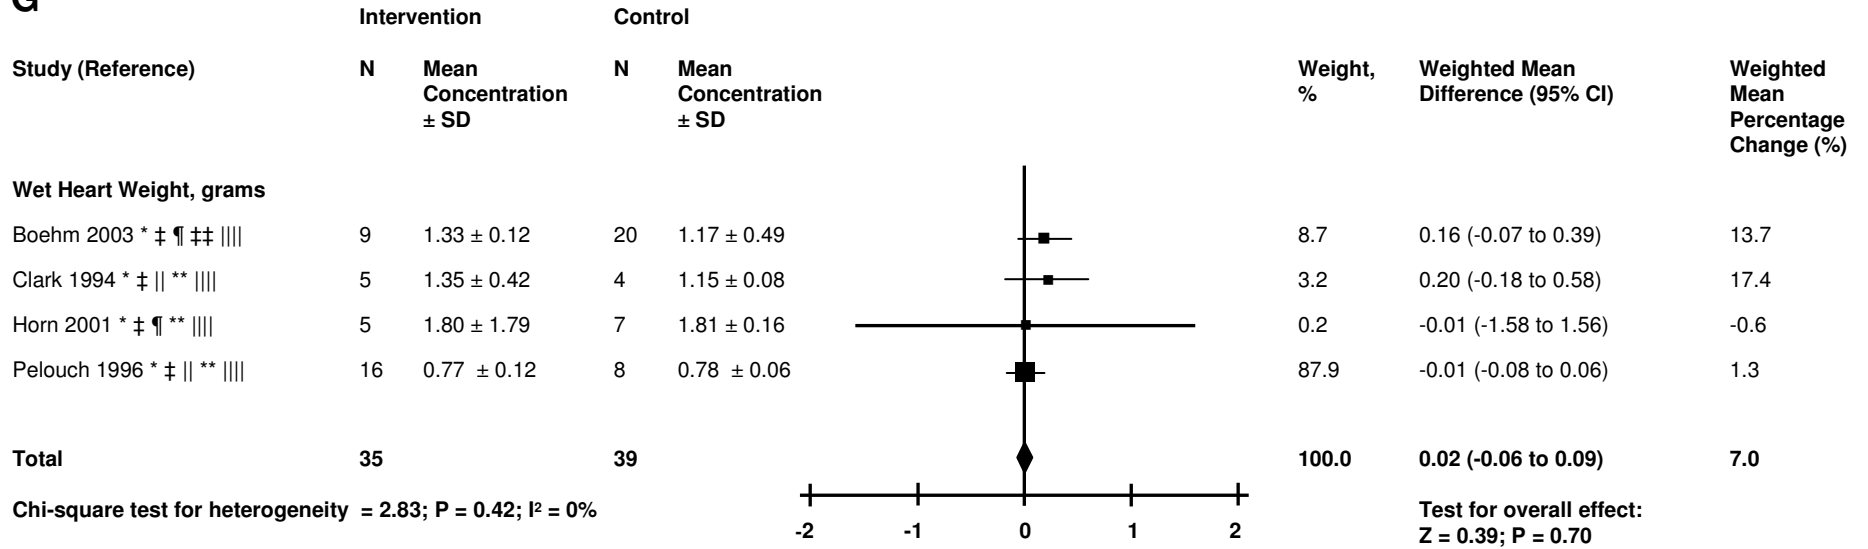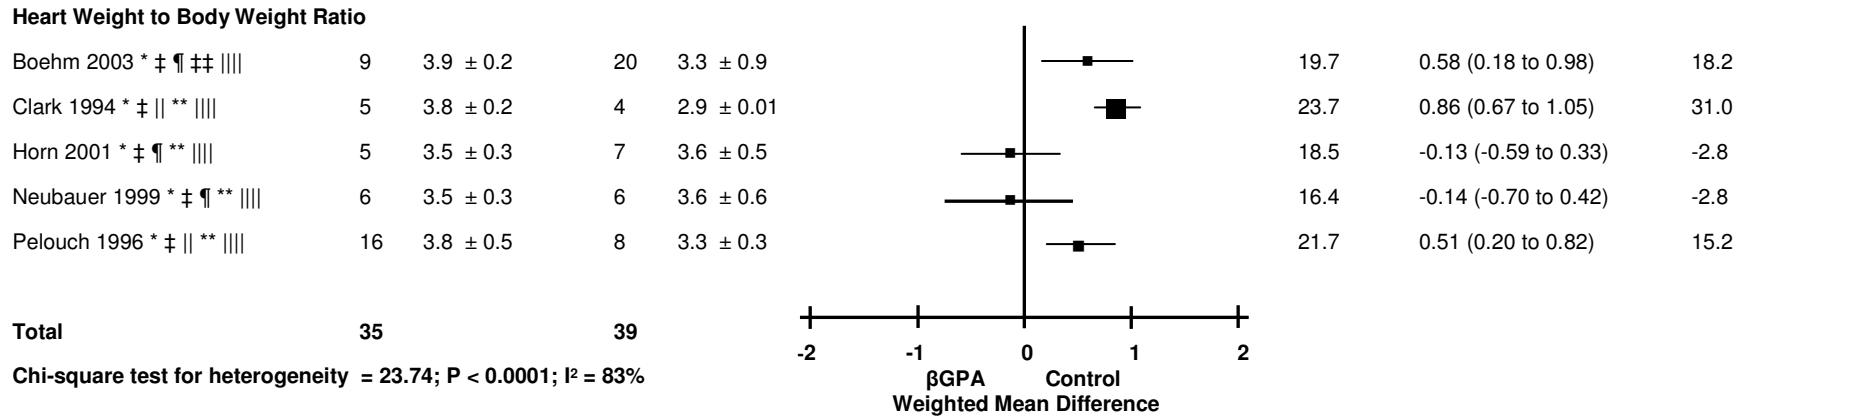

# H

| Study (Reference)                   | Intervention |                         | Control   |                         | Weight, % | Weighted Mean Difference (95% CI) | Weighted Mean Percentage Change (%) |
|-------------------------------------|--------------|-------------------------|-----------|-------------------------|-----------|-----------------------------------|-------------------------------------|
|                                     | N            | Mean Concentration ± SD | N         | Mean Concentration ± SD |           |                                   |                                     |
| <b>Left Ventricle Weight, grams</b> |              |                         |           |                         |           |                                   |                                     |
| Lorentzon 2007 * ‡    ‡‡            | 15           | 1.25 ± 0.04             | 15        | 0.93 ± 0.23             | 23.5      | 0.32 (0.20 to 0.44)               | 34.4                                |
| Mekhfi 1990 * ‡    ** ¶¶            | 12           | 1.01 ± 0.12             | 12        | 0.80 ± 0.12             | 24.8      | 0.21 (0.11 to 0.31)               | 26.3                                |
| Neubauer 1999 * ‡ ¶¶ **             | 6            | 0.92 ± 0.05             | 6         | 0.91 ± 0.10             | 25.1      | 0.01 (-0.08 to 0.10)              | 1.1                                 |
| Pelouch 1996 * ‡    **              | 16           | 0.42 ± 0.09             | 8         | 0.43 ± 0.05             | 26.6      | -0.02 (-0.07 to 0.04)             | -2.3                                |
| <b>Total</b>                        | <b>49</b>    |                         | <b>41</b> |                         |           |                                   |                                     |

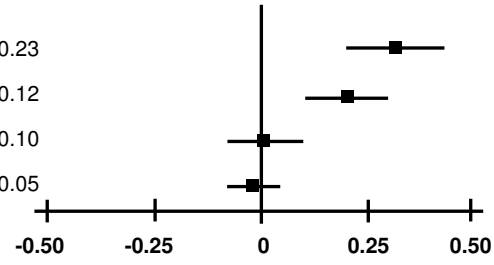

Chi-square test for heterogeneity = 36.11; P < 0.00001; I<sup>2</sup> = 92%

| Study (Reference)                                 | Intervention |                         | Control   |                         | Weight, %    | Weighted Mean Difference (95% CI) | Weighted Mean Percentage Change (%) |
|---------------------------------------------------|--------------|-------------------------|-----------|-------------------------|--------------|-----------------------------------|-------------------------------------|
|                                                   | N            | Mean Concentration ± SD | N         | Mean Concentration ± SD |              |                                   |                                     |
| <b>Left Ventricle Weight to Body Weight Ratio</b> |              |                         |           |                         |              |                                   |                                     |
| Adams 1995 * §    **                              | 8            | 2.2 ± 0.2               | 8         | 2.2 ± 0.2               | 26.7         | 0.00 (-0.15 to 0.15)              | 0.0                                 |
| Lorentzon 2007 * ‡    ‡‡                          | 15           | 2.8 ± 0.2               | 15        | 2.1 ± 0.6               | 23.1         | 0.70 (0.39 to 1.01)               | 33.3                                |
| Mekhfi 1990 * ‡    ** ¶¶                          | 12           | 2.7 ± 0.2               | 12        | 2.1 ± 0.2               | 25.3         | 0.62 (0.40 to 0.84)               | 28.6                                |
| Pelouch 1996 * ‡    **                            | 16           | 2.0 ± 0.4               | 8         | 1.9 ± 0.2               | 24.9         | 0.15 (-0.09 to 0.39)              | 5.3                                 |
| <b>Total</b>                                      | <b>45</b>    |                         | <b>39</b> |                         | <b>100.0</b> | <b>0.36 (0.01 to 0.71)</b>        | <b>19.3</b>                         |

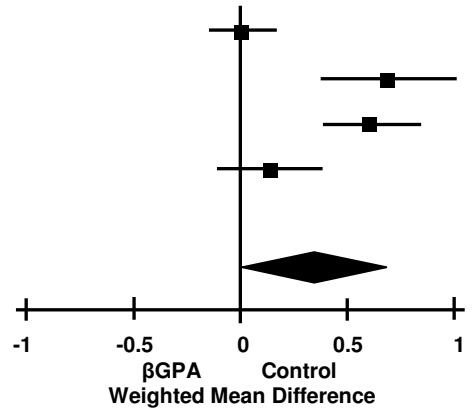

Test for overall effect:  
Z = 2.00; P = 0.05
